# Supplementary material for: Epistasis analysis for quantitative traits by functional regression model
Source: HighWire-hosted journal article supplement (doi:10.1101/gr.161760.113), 2014-05-06
Supplement: Supplemental_Table_S5.xlsx [file Supplemental_Table_S5.xlsx]

## Sheet: additional_list_filled
Supplemental Table S5. P-values of 130 pairs of mildly interacted genes
		Main (Gene)			Main (Gene)	P-value (Interaction)
						FRG
Chr	Gene 1	P-value	Chr	Gene 2	P-value	Logarithm	INT	PCA	Point wise
1	WASF2	0.224395	17	TBC1D3B	0.370399	5.1e-10	1.64e-09	2.13e-10	6.66e-07
5	ATG12	0.97058	14	ACYP1	0.947379	5.75e-10	1.59e-09	8.3e-10	4.18e-10
3	MCCC1	0.505895	3	POLR2H	0.0155242	6.17e-10	0.000492	0.0746889	1.12e-07
12	BBS10	0.947923	19	LENG1	0.436865	6.5e-10	0.000533	0.53558	1.8e-06
3	ATP2B2	0.00895351	15	RSL24D1	0.605897	7.19e-10	0.184	0.0170231	9.15e-05
1	FAM163A	0.625874	9	CACNA1B	0.689406	7.25e-10	0.292	6.1e-07	6.03e-10
9	PDCL	0.772666	21	B3GALT5	0.993334	8.55e-10	5.72e-05	0.823858	4.3e-06
8	SNTB1	0.934424	16	TPPP3	0.685443	9.1e-10	7.81e-06	2.23e-07	5.14e-05
8	SNTB1	0.934424	20	NAA20	0.819041	9.12e-10	6.9e-05	5.06e-07	2.28e-05
8	SNTB1	0.934424	12	C12orf54	0.605306	9.42e-10	4.23e-05	4.07e-05	0.0142815
3	MTMR14	0.127116	3	FBXL2	0.66963	9.6e-10	0.000716	0.0716193	2.93e-07
17	DDX5	0.318978	23	KDM6A	0.819717	1e-09	2.22e-05	0.00547497	3.03e-07
6	THBS2	0.440837	18	C18orf56	0.149184	1.02e-09	2.59e-07	0.356172	0.000157839
5	H2AFY	0.0335133	16	DDX19B	0.826764	1.05e-09	0.00323	7.01e-06	8.64e-09
13	CDK8	0.158361	22	GALR3	0.924274	1.05e-09	5.26e-10	0.000124771	8.36e-05
1	LRRC71	0.00811845	1	FAM163A	0.625874	1.09e-09	5.68e-08	0.0342302	1.41e-10
8	SNTB1	0.934424	12	LARP4	0.518203	1.11e-09	0.00102	0.000409651	1.46e-05
8	SNTB1	0.934424	22	HORMAD2	0.828462	1.15e-09	0.000326	9.4e-05	0.0420123
4	GC	0.705297	17	TBC1D3B	0.370399	1.16e-09	2.6e-09	3.57e-06	1.11e-07
11	C11orf31	0.00431605	17	TBC1D3B	0.370399	1.17e-09	1.13e-08	0.683244	0.000203385
8	SNTB1	0.934424	19	ALKBH6	0.393281	1.25e-09	6.61e-06	2.59e-06	6.31e-05
1	HCN3	0.903103	23	KDM6A	0.819717	1.25e-09	1.28e-06	0.403892	5.65e-08
16	THAP11	0.213028	19	MED26	0.861083	1.29e-09	1.26e-10	0.000153799	4.84e-09
10	PROSER2	0.45203	15	GALK2	0.0398306	1.34e-09	9.97e-10	0.0276006	2.67e-06
9	PDCL	0.772666	9	ST6GALNAC6	0.932978	1.34e-09	0.000212	0.411256	2.31e-06
9	GOLGA8A	0.772666	9	GJD3	0.932978	1.34e-09	5.2e-09	0.411256	2.31e-06
15	CDK8	0.326186	17	B4GALT6	0.154217	1.41e-09	1.5e-09	7.77e-06	3.69e-06
13	SNTB1	0.158361	18	METTL4	0.497594	1.46e-09	0.000419	1.78e-06	3.86e-05
8	GTPBP2	0.934424	18	VIP	0.263592	1.47e-09	1.16e-06	1.75e-06	2.59e-05
6	EZH1	0.962504	6	ZFP30	0.806401	1.49e-09	1.78e-08	0.0249947	6.76e-07
17	CTNNB1	0.756851	19	CACNA1B	0.935457	1.5e-09	0.957	0.000259497	6.82e-08
3	PRDM13	0.121849	9	FBXO33	0.689406	1.51e-09	3.6e-10	4.13e-06	6.47e-10
6	ATG7	0.0445424	14	TTC23L	0.271661	1.55e-09	1.27e-06	3.31e-09	5.17e-11
3	SNTB1	0.671906	5	RELT	0.850412	1.59e-09	0.000416	0.0173215	6.48e-11
8	TTC29	0.934424	11	TBC1D3B	0.378983	1.69e-09	1.73e-09	0.140064	3.84e-05
4	POLR2J	0.603235	17	CACNA1B	0.370399	1.85e-09	0.936	0.583645	2.1e-07
7	PRDM13	0.272162	9	SAA1	0.689406	1.87e-09	2.3e-08	2.37e-07	4.18e-08
6	C5orf45	0.0445424	11	PRDM13	0.988441	1.92e-09	7.67e-05	4.17e-10	1.55e-11
5	PDCL	0.952719	6	INTS10	0.0445424	1.93e-09	0.22	0.000206021	2.83e-09
3	APOD	0.0590927	5	CLK4	0.206351	1.97e-09	1.25e-06	0.0392894	1.94e-10
1	EFNA3	0.928726	17	TBC1D3B	0.370399	2.03e-09	1.02e-09	1.68e-09	8.18e-10
8	GINS4	0.187542	11	SAA1	0.988441	2.03e-09	8.09e-10	0.430868	9.05e-05
13	CDK8	0.158361	16	HP	0.705466	2.28e-09	7.58e-09	9.23e-05	5.43e-05
8	SNTB1	0.934424	12	DGKA	0.53865	2.31e-09	0.00018	0.000195369	0.0188141
8	SNTB1	0.934424	14	DNAL1	0.0298319	2.31e-09	6.52e-05	1.57e-05	2.8e-05
6	PRDM13	0.0445424	16	PDF	0.385641	2.53e-09	5.41e-11	1.38e-08	2.57e-07
8	LRP12	0.0030238	18	FAM210A	0.57127	2.65e-09	5.2e-08	0.00241614	1.89e-05
3	ATP2B2	0.00895351	5	CDX1	0.788013	2.67e-09	0.0239	0.13399	0.00704684
1	NBPF12	0.0426066	6	HIST1H2BM	0.36946	2.72e-09	4.04e-05	0.633976	0.000215384
18	C18orf56	0.149184	19	ZFP30	0.935457	2.72e-09	1.63e-08	0.00485909	1.01e-07
6	SLC35A1	0.493095	17	TBC1D3B	0.370399	2.74e-09	8.24e-08	9.21e-10	4.64e-10
6	PRDM13	0.0445424	6	RAET1G	0.731797	2.96e-09	2.79e-08	3.63e-10	1.1e-11
3	ATP2B2	0.00895351	12	MDM2	0.794598	3.01e-09	2.53e-05	0.0789611	0.0101907
16	ADAMTS18	0.234396	17	TBC1D3B	0.370399	3.2e-09	7.29e-08	1.19e-10	6.32e-12
1	SFPQ	0.276266	16	CMC2	0.776791	3.27e-09	6.75e-05	7.67e-08	5.51e-06
2	FER1L5	0.00761947	5	ADRA1B	0.0317479	3.33e-09	7.78e-07	0.567503	0.0199121
2	FER1L5	0.00761947	6	ECI2	0.88681	3.33e-09	8.63e-07	0.00109619	0.000126611
9	PDCL	0.772666	12	LRTM2	0.541819	3.65e-09	0.00284	0.158996	7.03e-07
8	SNTB1	0.934424	16	AGRP	0.492194	3.83e-09	6.52e-05	2.05e-07	5.57e-05
8	SNTB1	0.934424	18	GAREM	0.855996	3.86e-09	0.000763	0.000128688	0.000249873
11	AMBRA1	0.573643	14	CALM1	0.386531	3.97e-09	2.39e-05	0.000555572	1.75e-06
2	FER1L5	0.00761947	21	MX2	0.015389	4.03e-09	9.04e-11	0.153771	0.00478638
3	KLHL18	0.819451	19	ZNF583	0.00466499	4.03e-09	2.79e-05	0.419115	4.96e-05
8	SNTB1	0.934424	16	LRRC36	0.941271	4.05e-09	0.000121	6.05e-06	5.97e-05
15	CSNK1G3	0.954199	19	ZFP30	0.935457	4.24e-09	6.87e-08	1.16e-08	1.56e-07
11	CREB3L1	0.788563	17	TBC1D3B	0.370399	4.32e-09	2.8e-05	4.87e-09	2.46e-09
2	TMEM169	0.274918	17	SLC25A19	0.819417	4.36e-09	2.91e-10	0.807538	0.014403
8	SNTB1	0.934424	16	PARD6A	0.920607	4.41e-09	9.27e-05	5.85e-06	5.25e-05
5	MZB1	0.539117	7	LINC00174	0.950865	4.51e-09	0.0144	0.542304	7.42e-10
1	MAN1C1	0.177765	17	TBC1D3B	0.370399	4.75e-09	4.87e-11	0.211222	8.88e-08
22	GALR3	0.924274	23	KDM6A	0.819717	4.78e-09	1.1e-07	0.00196783	2.31e-07
5	TAF9	0.361286	8	INTS10	0.773541	4.84e-09	1.42e-06	8.65e-05	2.56e-05
1	HP1BP3	0.0391217	2	DRC1	0.0858958	4.87e-09	8.55e-07	0.0828978	0.008329
1	TIPRL	0.243445	2	CDK5R2	0.763622	5.12e-09	0.000788	0.12376	0.000105547
6	HIST1H2BM	0.36946	11	KRTAP5-1	0.655096	5.13e-09	2.84e-05	0.0030917	0.00033328
2	SLC30A3	0.624537	11	DPF2	0.051304	5.17e-09	0.000156	8.26e-06	3e-06
11	PRG2	0.529026	23	DMD	0.955024	5.18e-09	0.956	0.78217	0.011656
2	EPCAM	0.860935	16	THAP11	0.213028	5.32e-09	5.08e-10	1.01e-06	1.81e-08
7	TBXAS1	0.252805	8	LRP12	0.0030238	5.33e-09	1.51e-05	0.000250376	5.03e-10
16	TELO2	0.0806832	17	TBC1D3B	0.370399	5.44e-09	4.41e-07	1.71e-06	4.16e-07
1	HP1BP3	0.0391217	16	SYT17	0.963241	5.53e-09	1.31e-09	0.723543	0.00338739
19	PKN1	0.797172	23	RENBP	0.0836034	5.63e-09	9.57e-07	0.135347	3.25e-07
3	TXNRD3NB	0.460521	7	LMOD1	0.451473	5.66e-09	0.429	0.000207734	1.85e-06
16	GAN	0.49915	17	TBC1D3B	0.370399	5.72e-09	7.66e-08	0.0123735	1.59e-07
4	AMBN	0.474044	6	PRDM13	0.0445424	5.75e-09	2.22e-06	0.0457352	3.38e-11
1	LRRC71	0.00811845	7	ZBED6CL	0.798138	5.76e-09	1.05e-07	0.000544404	6.98e-07
8	SNTB1	0.934424	22	LMF2	0.656496	5.8e-09	0.00096	0.000124818	2.09e-05
8	SNTB1	0.934424	14	SERPINA12	0.89208	6.1e-09	0.000446	4.71e-05	5.47e-05
6	SNTB1	0.177092	11	SLFN5	0.320663	6.35e-09	0.0382	1.25e-06	7.14e-06
4	MRPS18A	0.660992	12	KCNC1	0.330275	6.37e-09	2.2e-05	9.44e-09	0.00113499
5	FAM114A1	0.539117	19	H2AFJ	0.436865	6.37e-09	5.44e-08	0.158722	2.96e-09
10	MZB1	0.895439	17	LENG1	0.370399	6.58e-09	1.74e-05	0.000327983	5.68e-07
1	CALY	0.316603	6	TBC1D3B	0.806401	6.6e-09	9.35e-07	1.38e-07	9.69e-09
9	CDC42	0.689406	15	VIP	0.326527	6.89e-09	6.55e-09	5.61e-07	6.41e-10
1	CACNA1B	0.903103	3	ITPKA	0.121849	6.93e-09	0.156	0.244576	4.93e-08
5	HCN3	0.389981	9	CTNNB1	0.579288	7.1e-09	4.78e-09	0.0983413	0.00564845
11	SLC45A2	0.967192	17	PTRH1	0.836249	7.2e-09	2.01e-08	0.625091	1.89e-06
11	FAM168A	0.967192	17	OR1A2	0.824785	7.3e-09	2.85e-08	0.198073	1.05e-06
15	FAM168A	0.256096	16	SLFN5	0.868428	7.62e-09	1.67e-06	0.302051	9.71e-08
11	USP3	0.967192	21	TMED6	0.768055	7.73e-09	0.0091	0.357485	2.29e-06
7	FAM168A	0.000170133	15	UBE2G2	0.566765	7.76e-09	7.92e-08	0.566176	0.000860137
1	FAM220A	0.928726	6	GCNT3	0.0445424	8.03e-09	0.241	2.36e-07	1.9e-09
1	EFNA3	0.0484947	1	PRDM13	0.709416	8.14e-09	2.24e-07	0.00329834	0.0017126
1	GPR25	0.866651	11	NSL1	0.389499	8.21e-09	3.38e-05	0.0536976	1.07e-09
1	NEK7	0.864695	6	PRG3	0.0445424	8.36e-09	6.43e-05	0.215888	0.000224038
8	MUTYH	0.934424	12	PRDM13	0.0541515	8.47e-09	1.5e-06	0.000689759	0.0165939
18	SNTB1	0.0840889	20	ZNF268	0.875937	8.51e-09	4.27e-05	0.917576	2.89e-08
6	RAB12	0.888405	16	LAMP5	0.213028	8.63e-09	1.36e-06	0.0269225	1.66e-08
8	SMPDL3A	0.934424	12	THAP11	0.758393	8.69e-09	1.84e-09	7.04e-05	5.5e-05
8	SNTB1	0.934424	10	PPFIBP1	0.985392	8.74e-09	0.000452	5.35e-05	3.55e-05
8	SNTB1	0.934424	22	ZNF25	0.479356	8.76e-09	0.000247	5.63e-06	3.24e-05
2	SNTB1	0.862004	17	KCNJ4	0.370399	8.78e-09	0.000736	0.159768	1.55e-12
8	LPIN1	0.934424	13	TBC1D3B	0.386957	8.82e-09	5.03e-06	9.44e-05	3.51e-05
8	SNTB1	0.934424	13	LPAR6	0.386957	8.82e-09	0.000265	9.44e-05	3.51e-05
8	SNTB1	0.934424	16	ZDHHC1	0.496553	8.84e-09	0.000152	3.11e-07	5.54e-05
8	SNTB1	0.934424	11	TRPC6	0.380828	8.91e-09	0.00151	0.000263811	0.0162136
8	SNTB1	0.934424	19	C19orf66	0.743518	9.08e-09	2.8e-05	1.36e-05	4.8e-05
2	CHN1	0.910861	6	DYNLT1	0.699793	9.08e-09	7.37e-05	0.0366226	0.000578751
2	POLR1A	0.165813	17	TBC1D3B	0.370399	9.1e-09	7.17e-08	0.121641	4.52e-07
8	SNTB1	0.934424	11	ZW10	0.700737	9.19e-09	0.000256	1.44e-05	2.4e-05
2	LPIN1	0.862004	9	ASB6	0.13476	9.31e-09	1.23e-06	0.0728432	8.95e-07
4	RBM46	0.417885	5	NKX2-5	0.627244	9.31e-09	0.00284	1.69e-07	2.44e-10
4	STARD10	0.417885	5	KRTAP27-1	0.627244	9.31e-09	0.000121	1.69e-07	2.44e-10
11	ANO6	0.753983	21	THAP11	0.337453	9.33e-09	1.15e-10	4.85e-07	0.0108175
12	ANAPC5	0.0565468	16	KDM6A	0.213028	9.53e-09	0.000108	2.49e-07	8.96e-09
12	PRDM13	0.845331	23	ELAVL3	0.819717	9.63e-09	2.04e-06	0.00412635	2.74e-07
6	THAP11	0.0445424	19	GSS	0.780739	9.64e-09	7.42e-11	0.00451013	2.95e-06
16	MRPS18A	0.213028	20	NKX2-5	0.295301	9.67e-09	0.00874	0.0110079	2.38e-09
5	CEP120	0.0500318	6	PRDM13	0.0445424	9.83e-09	9.48e-08	0.678456	2.91e-11
6	MTO1	0.776521	9	DPH7	0.49086	9.87e-09	0.000295	0.48392	6.38e-05
NA indicate that genes only have two SNPs and the FLM cannot be applied to testing marginal association.
INT: the rank-based		inverse normal transformation of the HDL.

## Sheet: Sheet1
Chr	Gene 1	P-value	Chr	Gene 2	P-value	FRG	PCA	Point wise
5	ATG12	0.97058	14	ACYP1	0.947379	5.75e-10	8.3e-10	4.18e-10
5	hAPG12	0.97058	14	ACYP1	0.947379	5.75e-10	8.3e-10	4.18e-10
2	FER1L5	0.00761947	5	ADRA1B	0.0317479	3.33e-09	0.567503	0.0199121
8	SNTB1	0.934424	16	AGRP	0.492194	3.83e-09	2.05e-07	5.57e-05
8	SNTB1	0.934424	19	ALKBH6	0.393281	1.25e-09	2.59e-06	6.31e-05
2	LPIN1	0.862004	9	ASB6	0.13476	9.31e-09	0.0728432	8.95e-07
9	PDCL	0.772666	21	B3GALT5	0.993334	8.55e-10	0.823858	4.3e-06
13	CDK8	0.158361	18	B4GALT6	0.497594	1.46e-09	1.78e-06	3.86e-05
8	SNTB1	0.934424	12	C12orf54	0.605306	9.42e-10	4.07e-05	0.0142815
1	SFPQ	0.276266	16	C16orf61	0.776791	3.27e-09	7.67e-08	5.51e-06
8	LRP12	0.0030238	18	C18orf19	0.57127	2.65e-09	0.00241614	1.89e-05
6	THBS2	0.440837	18	C18orf56	0.149184	1.02e-09	0.356172	0.000157839
8	SNTB1	0.934424	19	C19orf66	0.743518	9.08e-09	1.36e-05	4.8e-05
18	RAB12	0.0840889	20	C20orf103	0.875937	8.51e-09	0.917576	2.89e-08
1	HP1BP3	0.0391217	2	C2orf39	0.0858958	4.87e-09	0.0828978	0.008329
1	C1orf92	0.00811845	7	C7orf29	0.798138	5.76e-09	0.000544404	6.98e-07
11	AMBRA1	0.573643	14	CALM1	0.386531	3.97e-09	0.000555572	1.75e-06
1	TIPRL	0.243445	2	CDK5R2	0.763622	5.12e-09	0.12376	0.000105547
3	PMCA2	0.00895351	5	CDX1	0.788013	2.67e-09	0.13399	0.00704684
3	APOD	0.0590927	5	CLK4	0.206351	1.97e-09	0.0392894	1.94e-10
1	HCN3	0.903103	3	CTNNB1	0.121849	6.93e-09	0.244576	4.93e-08
3	TXNRD3IT1	0.460521	7	D1	0.451473	5.66e-09	0.000207734	1.85e-06
5	H2AFY	0.0335133	16	DDX19B	0.826764	1.05e-09	7.01e-06	8.64e-09
8	SNTB1	0.934424	12	DGKA	0.53865	2.31e-09	0.000195369	0.0188141
11	PRG2	0.529026	23	DMD	0.955024	5.18e-09	0.78217	0.011656
8	SNTB1	0.934424	14	DNAL1	0.0298319	2.31e-09	1.57e-05	2.8e-05
2	SLC30A3	0.624537	11	DPF2	0.051304	5.17e-09	8.26e-06	3e-06
2	CHN1	0.910861	6	DYNLT1	0.699793	9.08e-09	0.0366226	0.000578751
6	PRDM13	0.0445424	19	ELAVL3	0.780739	9.64e-09	0.00451013	2.95e-06
1	C1orf92	0.00811845	1	FAM163A	0.625874	1.09e-09	0.0342302	1.41e-10
8	SNTB1	0.934424	18	FAM59A	0.855996	3.86e-09	0.000128688	0.000249873
3	MTMR14	0.127116	3	FBL2	0.66963	9.6e-10	0.0716193	2.93e-07
6	PRDM13	0.0445424	14	FBXO33	0.271661	1.55e-09	3.31e-09	5.17e-11
8	SNTB1	0.934424	11	FLJ00200	0.378983	1.69e-09	0.140064	3.84e-05
3	CTNNB1	0.121849	9	FP13812	0.689406	1.51e-09	4.13e-06	6.47e-10
1	FAM163A	0.625874	9	FP13812	0.689406	7.25e-10	6.1e-07	6.03e-10
7	POLR2J	0.272162	9	FP13812	0.689406	1.87e-09	2.37e-07	4.18e-08
10	C10orf47	0.45203	15	GALK2	0.0398306	1.34e-09	0.0276006	2.67e-06
13	CDK8	0.158361	22	GALR3	0.924274	1.05e-09	0.000124771	8.36e-05
7	C7orf70	0.000170133	15	GCNT3	0.566765	7.76e-09	0.566176	0.000860137
15	GOLGA8A	0.326186	17	GJD3	0.154217	1.41e-09	7.77e-06	3.69e-06
16	THAP11	0.213028	20	GSS	0.295301	9.67e-09	0.0110079	2.38e-09
4	FAM114A1	0.660992	12	H2AFJ	0.330275	6.37e-09	9.44e-09	0.00113499
1	NBPF12	0.0426066	6	HIST1H2BM	0.36946	2.72e-09	0.633976	0.000215384
8	SNTB1	0.934424	22	HORMAD2	0.828462	1.15e-09	9.4e-05	0.0420123
13	CDK8	0.158361	16	HP	0.705466	2.28e-09	9.23e-05	5.43e-05
5	TAF9	0.361286	8	INTS10	0.773541	4.84e-09	8.65e-05	2.56e-05
9	FP13812	0.689406	15	ITPKA	0.326527	6.89e-09	5.61e-07	6.41e-10
6	MRPS18A	0.177092	11	KCNC1	0.320663	6.35e-09	1.25e-06	7.14e-06
8	SNTB1	0.934424	22	KCNJ4	0.479356	8.76e-09	5.63e-06	3.24e-05
12	ANAPC5	0.845331	23	KDM6A	0.819717	9.63e-09	0.00412635	2.74e-07
17	DDX5	0.318978	23	KDM6A	0.819717	1e-09	0.00547497	3.03e-07
22	GALR3	0.924274	23	KDM6A	0.819717	4.78e-09	0.00196783	2.31e-07
1	HCN3	0.903103	23	KDM6A	0.819717	1.25e-09	0.403892	5.65e-08
11	STARD10	0.753983	21	KRTAP27-1	0.337453	9.33e-09	4.85e-07	0.0108175
6	HIST1H2BM	0.36946	11	KRTAP5-1	0.655096	5.13e-09	0.0030917	0.00033328
8	SNTB1	0.934424	12	LARP4	0.518203	1.11e-09	0.000409651	1.46e-05
12	BBS10	0.947923	19	LENG1	0.436865	6.5e-10	0.53558	1.8e-06
5	MGC29506	0.539117	19	LENG1	0.436865	6.37e-09	0.158722	2.96e-09
8	SNTB1	0.934424	22	LMF2	0.656496	5.8e-09	0.000124818	2.09e-05
8	SNTB1	0.934424	13	LPAR6	0.386957	8.82e-09	9.44e-05	3.51e-05
7	TBXAS1	0.252805	8	LRP12	0.0030238	5.33e-09	0.000250376	5.03e-10
8	SNTB1	0.934424	16	LRRC36	0.941271	4.05e-09	6.05e-06	5.97e-05
9	PDCL	0.772666	12	LRTM2	0.541819	3.65e-09	0.158996	7.03e-07
3	PMCA2	0.00895351	12	MDM2	0.794598	3.01e-09	0.0789611	0.0101907
16	THAP11	0.213028	19	MED26	0.861083	1.29e-09	0.000153799	4.84e-09
8	SNTB1	0.934424	18	METTL4	0.263592	1.47e-09	1.75e-06	2.59e-05
2	FER1L5	0.00761947	21	MX2	0.015389	4.03e-09	0.153771	0.00478638
8	SNTB1	0.934424	20	NAT5	0.819041	9.12e-10	5.06e-07	2.28e-05
5	MGC29506	0.539117	7	NCRNA00174	0.950865	4.51e-09	0.542304	7.42e-10
4	MGC27016	0.417885	5	NKX2-5	0.627244	9.31e-09	1.69e-07	2.44e-10
4	RBM46	0.417885	5	NKX2-5	0.627244	9.31e-09	1.69e-07	2.44e-10
1	GPR25	0.0484947	1	NSL1	0.709416	8.14e-09	0.00329834	0.0017126
11	FAM168A	0.967192	17	OR1A2	0.836249	7.2e-09	0.625091	1.89e-06
8	SNTB1	0.934424	13	P2RY5	0.386957	8.82e-09	9.44e-05	3.51e-05
8	SNTB1	0.934424	16	PARD6A	0.920607	4.41e-09	5.85e-06	5.25e-05
6	PRDM13	0.0445424	16	PDF	0.385641	2.53e-09	1.38e-08	2.57e-07
2	FER1L5	0.00761947	6	PECI	0.88681	3.33e-09	0.00109619	0.000126611
3	MCC-B	0.505895	3	POLR2H	0.0155242	6.17e-10	0.0746889	1.12e-07
8	SNTB1	0.934424	12	PPFIBP1	0.758393	8.69e-09	7.04e-05	5.5e-05				TBC1D3B	3.2e-09
4	AMBN	0.474044	6	PRDM13	0.0445424	5.75e-09	0.0457352	3.38e-11				TBC1D3B	1.17e-09
5	C5orf45	0.952719	6	PRDM13	0.0445424	1.93e-09	0.000206021	2.83e-09				TBC1D3B	6.58e-09
5	CEP120	0.0500318	6	PRDM13	0.0445424	9.83e-09	0.678456	2.91e-11				TBC1D3B	2.03e-09
1	EFNA3	0.928726	6	PRDM13	0.0445424	8.03e-09	2.36e-07	1.9e-09				TBC1D3B	5.72e-09
1	MUTYH	0.864695	6	PRDM13	0.0445424	8.36e-09	0.215888	0.000224038				TBC1D3B	1.16e-09
1	NEK7	0.866651	11	PRG3	0.389499	8.21e-09	0.0536976	1.07e-09				TBC1D3B	8.78e-09
5	SLC45A2	0.389981	9	PTRH1	0.579288	7.1e-09	0.0983413	0.00564845				TBC1D3B	4.75e-09
6	PRDM13	0.0445424	6	RAET1G	0.731797	2.96e-09	3.63e-10	1.1e-11				TBC1D3B	4.32e-09
19	PKN1	0.797172	23	RENBP	0.0836034	5.63e-09	0.135347	3.25e-07				TBC1D3B	9.1e-09
3	PMCA2	0.00895351	15	RSL24D1	0.605897	7.19e-10	0.0170231	9.15e-05				TBC1D3B	2.74e-09
8	GINS4	0.187542	11	SAA1	0.988441	2.03e-09	0.430868	9.05e-05				TBC1D3B	5.44e-09
6	PRDM13	0.0445424	11	SAA1	0.988441	1.92e-09	4.17e-10	1.55e-11				TBC1D3B	1.85e-09
8	SNTB1	0.934424	14	SERPINA12	0.89208	6.1e-09	4.71e-05	5.47e-05				TBC1D3B	5.1e-10
2	TMEM169	0.274918	17	SLC25A19	0.819417	4.36e-09	0.807538	0.014403
11	FAM168A	0.967192	17	SLFN5	0.824785	7.3e-09	0.198073	1.05e-06
9	PDCL	0.772666	9	ST6GalNAc VI	0.932978	1.34e-09	0.411256	2.31e-06
9	PDCL	0.772666	9	ST6GALNAC6	0.932978	1.34e-09	0.411256	2.31e-06
1	HP1BP3	0.0391217	16	SYT17	0.963241	5.53e-09	0.723543	0.00338739
16	ADAMTS18	0.234396	17	TBC1D3B	0.370399	3.2e-09	1.19e-10	6.32e-12
11	C11orf31	0.00431605	17	TBC1D3B	0.370399	1.17e-09	0.683244	0.000203385
10	CALY	0.895439	17	TBC1D3B	0.370399	6.58e-09	0.000327983	5.68e-07
1	EFNA3	0.928726	17	TBC1D3B	0.370399	2.03e-09	1.68e-09	8.18e-10
16	GAN	0.49915	17	TBC1D3B	0.370399	5.72e-09	0.0123735	1.59e-07
4	GC	0.705297	17	TBC1D3B	0.370399	1.16e-09	3.57e-06	1.11e-07
2	LPIN1	0.862004	17	TBC1D3B	0.370399	8.78e-09	0.159768	1.55e-12
1	MAN1C1	0.177765	17	TBC1D3B	0.370399	4.75e-09	0.211222	8.88e-08
11	OASIS	0.788563	17	TBC1D3B	0.370399	4.32e-09	4.87e-09	2.46e-09
2	POLR1A	0.165813	17	TBC1D3B	0.370399	9.1e-09	0.121641	4.52e-07
6	SLC35A1	0.493095	17	TBC1D3B	0.370399	2.74e-09	9.21e-10	4.64e-10
16	TELO2	0.0806832	17	TBC1D3B	0.370399	5.44e-09	1.71e-06	4.16e-07
4	TTC29	0.603235	17	TBC1D3B	0.370399	1.85e-09	0.583645	2.1e-07
1	WASF2	0.224395	17	TBC1D3B	0.370399	5.1e-10	2.13e-10	6.66e-07
12	ANO6	0.0565468	16	THAP11	0.213028	9.53e-09	2.49e-07	8.96e-09
2	EPCAM	0.860935	16	THAP11	0.213028	5.32e-09	1.01e-06	1.81e-08
6	SMPDL3A	0.888405	16	THAP11	0.213028	8.63e-09	0.0269225	1.66e-08
15	USP3	0.256096	16	TMED6	0.868428	7.62e-09	0.302051	9.71e-08
8	SNTB1	0.934424	16	TPPP3	0.685443	9.1e-10	2.23e-07	5.14e-05
8	SNTB1	0.934424	11	TRPC6	0.380828	8.91e-09	0.000263811	0.0162136
3	ATG7	0.671906	5	TTC23L	0.850412	1.59e-09	0.0173215	6.48e-11
11	FAM168A	0.967192	21	UBE2G2	0.768055	7.73e-09	0.357485	2.29e-06
1	CDC42	0.316603	6	VIP	0.806401	6.6e-09	1.38e-07	9.69e-09
6	GTPBP2	0.962504	6	VIP	0.806401	1.49e-09	0.0249947	6.76e-07
6	MTO1	0.776521	9	WDR85	0.49086	9.87e-09	0.48392	6.38e-05
8	SNTB1	0.934424	16	ZDHHC1	0.496553	8.84e-09	3.11e-07	5.54e-05
18	C18orf56	0.149184	19	ZFP30	0.935457	2.72e-09	0.00485909	1.01e-07
15	CSNK1G3	0.954199	19	ZFP30	0.935457	4.24e-09	1.16e-08	1.56e-07
17	EZH1	0.756851	19	ZFP30	0.935457	1.5e-09	0.000259497	6.82e-08
8	SNTB1	0.934424	10	ZNF25	0.985392	8.74e-09	5.35e-05	3.55e-05
8	SNTB1	0.934424	12	ZNF268	0.0541515	8.47e-09	0.000689759	0.0165939
3	KLHL18	0.819451	19	ZNF583	0.00466499	4.03e-09	0.419115	4.96e-05
8	SNTB1	0.934424	11	ZW10	0.700737	9.19e-09	1.44e-05	2.4e-05
NA indicate that genes only have two SNPs and the FLM cannot be applied to testing marginal association.

## Sheet: Sheet2
TBC1D3B	5.1e-10
TBC1D3B	1.16e-09
TBC1D3B	1.17e-09
TBC1D3B	1.85e-09
TBC1D3B	2.03e-09
TBC1D3B	2.74e-09
TBC1D3B	3.2e-09
TBC1D3B	4.32e-09
TBC1D3B	4.75e-09
TBC1D3B	5.44e-09
TBC1D3B	5.72e-09
TBC1D3B	6.58e-09
TBC1D3B	8.78e-09
TBC1D3B	9.1e-09
