# Supplementary material for: Epistasis analysis for quantitative traits by functional regression model
Source: HighWire-hosted journal article supplement (doi:10.1101/gr.161760.113), 2014-05-06
Supplement: Supplemental_Table_S9.xlsx [file Supplemental_Table_S9.xlsx]

## Sheet: Sheet1
Supplemental Table S9. P-values of interaction between Loci influencing lipid levels discovered in previous GWAS and other genes in our analysis
				P-value
Chr	Gene 1	Chr	Gene 2	FRG	PCA	Pointwise
1	GALNT2	6	NEU1	8.21e-06	0.000355176	0.0327961
1	GALNT2	6	GTF2H5	3.7e-05	7.23438e-05	0.0135559
1	GALNT2	12	ANP32D	5.94e-05	0.00135586	2.86409e-05
1	GALNT2	17	RAB37	7.57e-05	0.00618815	0.00887496
1	GALNT2	10	ZNF485	8.23e-05	0.96812	0.00250568
1	RPA2	23	MST4	6.66e-07	0.958071	0.0415986
1	RPA2	11	JRKL	7.72e-06	0.000542161	2.69981e-05
1	RPA2	3	MAGEF1	1.86e-05	1.5052e-05	1.35343e-07
1	RPA2	23	SLC9A6	2.24e-05	0.000945132	3.30724e-06
1	RPA2	5	SUB1	2.76e-05	0.223774	0.00081315
1	PCSK9	13	GTF3A	4.97e-05	0.00141922	0.000137556
1	PCSK9	4	CXCL2	6.23e-05	0.00101782	0.00445353
1	SLAMF6	2	GALNT3	7.05e-05	0.464564	0.00944581
1	CD48	2	GALNT3	7.58e-05	0.464565	0.0329377
1	NEK7	2	GALNT3	7.85e-05	0.0756478	0.00244887
1	OR10T2	7	BAZ1B	1.6e-05	0.000724098	0.00211126
1	RHD	7	TBL2	4.9e-05	0.688446	0.0112438
1	NBPF12	8	LPL	9.47e-06	0.131822	0.00170925
1	GBP4	8	LPL	8.11e-05	0.0834919	0.000201346
1	GPR25	11	APOA4	5.54e-05	0.369996	0.0142815
1	S100A5	11	APOA1	1.47e-05	0.459893	0.00110654
1	ZMPSTE24	11	MADD	8.21e-05	0.0625009	0.00191288
1	AK5	12	MVK	6.01e-05	0.031315	4.86978e-05
1	SMG5	12	MVK	8.97e-05	0.00417804	6.13787e-05
1	CFHR3	16	CETP	2.43e-06	0.702993	0.0467617
1	DISP1	16	CETP	3.55e-06	0.805586	7.70996e-06
1	NBPF12	16	CETP	5.3e-06	0.0812235	1.41671e-05
1	LPAR3	16	CETP	3.16e-05	0.256733	0.0041642
1	MRPS21	16	CETP	5.72e-05	0.991659	0.00199184
1	GPR25	16	PRMT7	3.39e-05	0.23628	0.000718663
1	RHD	18	GALNT1	3.89e-05	0.998217	0.0215358
1	TOR1AIP1	18	GALNT1	6.5e-05	0.0403563	0.00170675
2	GALNT3	10	SH2D4B	2.96e-07	0.513398	0.000513489
2	GALNT3	6	DYNLT1	6.3e-07	2.46291e-05	0.00893304
2	GALNT3	5	F2RL2	9.19e-07	0.0151983	0.0244471
2	GALNT3	10	HPS6	3.1e-06	0.272184	0.00588201
2	GALNT3	8	MYBL1	4.11e-06	0.99129	0.00711633
2	GALNT3	19	KCTD15	4.34e-06	0.666579	0.0228244
2	GALNT3	18	CHST9	4.4e-06	0.114942	0.000664096
2	GALNT3	5	CLTB	4.63e-06	0.590748	0.00588432
2	GALNT3	12	TROAP	5.81e-06	0.102817	0.000420153
2	GALNT3	3	MTMR14	6.23e-06	0.456112	0.0109249
2	GALNT3	3	NT5DC2	7.47e-06	0.528397	0.00944581
2	GALNT3	10	ADD3	8.34e-06	0.832953	0.00579547
2	GALNT3	9	ISCA1	9e-06	0.17277	0.00879934
2	GALNT3	19	DAZAP1	9.41e-06	0.0112976	0.000420721
2	GALNT3	4	SCARB2	1.08e-05	0.0127737	0.00138021
2	GALNT3	5	TIGD6	1.22e-05	0.0554829	0.0107527
2	GALNT3	6	HLA-DMA	1.35e-05	0.239837	0.0276813
2	GALNT3	21	KCNE2	1.48e-05	0.561128	0.00600537
2	GALNT3	4	HAUS3	1.5e-05	0.129555	0.00845544
2	GALNT3	12	RIMKLB	1.56e-05	0.140391	0.0278502
2	GALNT3	10	RUFY2	1.73e-05	0.896521	0.00853232
2	GALNT3	4	CTSO	1.77e-05	0.529473	0.0170312
2	GALNT3	11	PRRG4	1.82e-05	0.321946	0.0044574
2	GALNT3	4	MXD4	1.84e-05	0.0794575	0.00930519
2	GALNT3	19	DDX49	1.87e-05	0.948767	0.00632083
2	GALNT3	17	CD300A	1.93e-05	0.0676412	0.00708343
2	GALNT3	17	FOXJ1	2.07e-05	0.478463	0.0164235
2	GALNT3	9	LCN1	2.07e-05	0.154614	0.00438014
2	GALNT3	9	BAG1	2.09e-05	0.378937	0.0237519
2	GALNT3	4	C4orf47	2.1e-05	0.0593081	0.00152401
2	GALNT3	6	GTF2H5	2.12e-05	0.999835	0.0204562
2	GALNT3	19	GAMT	2.13e-05	0.860512	0.00145307
2	GALNT3	9	GOLM1	2.13e-05	0.88617	0.00879934
2	GALNT3	11	KCNJ1	2.21e-05	0.00085625	0.00478755
2	GALNT3	17	TBC1D3B	2.24e-05	0.016334	0.0918031
2	GALNT3	21	SMIM11	2.25e-05	0.698888	0.0312641
2	GALNT3	21	CBR1	2.5e-05	0.488988	0.0365249
2	GALNT3	6	RNF5	2.31e-05	0.0965036	0.000494654
2	GALNT3	11	MED17	2.56e-05	0.388219	0.00819348
2	GALNT3	12	TMTC3	2.6e-05	0.0124285	0.00566753
2	GALNT3	19	TPGS1	2.65e-05	0.861946	0.022742
2	GALNT3	10	SMNDC1	2.66e-05	0.523029	0.0215358
2	GALNT3	6	PLAGL1	2.82e-05	0.72275	0.029476
2	GALNT3	6	ZBTB9	2.87e-05	0.276967	0.00446281
2	GALNT3	12	ZNF641	3.04e-05	0.271401	0.0215358
2	GALNT3	5	FAM193B	3.06e-05	0.878118	0.0215358
2	GALNT3	6	VIP	3.1e-05	0.621765	0.0377735
2	GALNT3	11	MRPL17	3.3e-05	0.233696	0.0252282
2	GALNT3	14	RTN1	3.37e-05	0.808873	0.00117487
2	GALNT3	10	ZNF511	3.39e-05	0.0611226	0.0103531
2	GALNT3	2	RPL37A	3.59e-05	0.513864	0.0251426
2	GALNT3	4	GC	3.59e-05	0.608833	0.00416304
2	GALNT3	8	C8orf22	3.61e-05	0.831395	0.00953395
2	GALNT3	12	METTL7B	3.66e-05	0.600911	0.0180701
2	GALNT3	9	NFIL3	3.98e-05	0.345312	0.0238879
2	GALNT3	2	TUBA4A	4.06e-05	0.656311	0.0215358
2	GALNT3	23	GPRASP1	4.21e-05	0.985516	0.0238879
2	GALNT3	6	GTPBP2	4.35e-05	0.37932	0.0167487
2	GALNT3	4	SMIM14	4.52e-05	0.00509133	0.00612394
2	GALNT3	17	SOST	4.53e-05	0.698487	0.0313824
2	GALNT3	22	ASCC2	4.59e-05	0.0878067	0.00796194
2	GALNT3	18	CABLES1	4.67e-05	0.519298	0.0173957
2	GALNT3	7	SHFM1	4.75e-05	0.59415	0.00966437
2	GALNT3	21	IL10RB	4.93e-05	0.00829492	0.00190439
2	GALNT3	14	ASPG	4.94e-05	0.247563	0.00169905
2	GALNT3	5	UQCRQ	4.95e-05	0.257512	0.00880304
2	GALNT3	19	TYROBP	5.26e-05	0.815558	0.0244471
2	GALNT3	2	CHN1	5.33e-05	0.902308	0.00612394
2	GALNT3	12	COQ10A	5.39e-05	0.973579	0.0186525
2	GALNT3	9	TGFBR1	5.4e-05	0.118399	0.00105006
2	GALNT3	23	MST4	5.48e-05	0.997672	0.0281288
2	GALNT3	23	OFD1	5.63e-05	0.995657	0.0126398
2	GALNT3	7	TRBV4-1	5.99e-05	0.350946	0.00783442
2	GALNT3	11	MRPL49	6.07e-05	0.476136	0.0174486
2	GALNT3	14	ACOT4	6.1e-05	0.436046	0.00253422
2	GALNT3	3	ILDR1	6.12e-05	0.0441698	0.000930181
2	GALNT3	22	GNB1L	6.27e-05	0.0661888	0.00130201
2	GALNT3	10	SLC25A16	6.38e-05	0.122391	0.00953395
2	GALNT3	15	PTPN9	6.4e-05	0.158767	0.00923692
2	GALNT3	17	RNFT1	6.53e-05	0.69763	0.0186525
2	GALNT3	11	KRTAP5-10	6.8e-05	0.246702	0.0211532
2	GALNT3	2	IGFBP2	6.8e-05	0.53672	0.00500221
2	GALNT3	19	SYNE4	6.87e-05	0.898418	0.0133904
2	GALNT3	16	ZC3H7A	7.01e-05	0.60631	0.00174979
2	GALNT3	19	BST2	7.06e-05	0.557884	0.0238879
2	GALNT3	10	RPS24	7.15e-05	0.000268529	0.0109919
2	GALNT3	3	CPA3	7.22e-05	0.168776	0.00513042
2	GALNT3	19	RPS15	7.29e-05	0.415385	0.014497
2	GALNT3	11	EHF	7.34e-05	0.27687	0.0109919
2	GALNT3	13	UGGT2	7.7e-05	0.801649	0.0092113
2	GALNT3	12	PLA2G1B	7.75e-05	0.45412	0.0276813
2	GALNT3	6	C6orf120	7.94e-05	0.104129	0.00936095
2	GALNT3	14	JKAMP	7.99e-05	0.724723	0.0112438
2	GALNT3	20	NAA20	8.05e-05	0.389107	0.0215358
2	GALNT3	14	TRAV12-1	8.13e-05	0.842341	0.00711633
2	GALNT3	4	BMPR1B	8.32e-05	0.353539	0.00490677
2	GALNT3	9	CTNNAL1	8.37e-05	0.626854	0.0116779
2	GALNT3	3	FBXL2	8.43e-05	0.332623	0.0114058
2	GALNT3	17	B9D1	8.84e-05	0.328572	0.00468594
2	GALNT3	7	HOXA1	8.95e-05	0.845177	0.0132199
2	GALNT3	6	TAAR9	9e-05	0.384974	0.0221727
2	GALNT3	4	PDE5A	9.37e-05	0.455789	0.00134052
2	GALNT3	19	C19orf47	9.72e-05	0.00194135	0.0276813
2	GALNT3	12	KRT86	9.87e-05	0.929635	0.00777818
2	APOB	6	SLC35A1	7.81e-08	0.311194	0.000110732
2	APOB	17	TBC1D3B	1.44e-07	0.0147028	8.94843e-07
2	APOB	5	TNFAIP8	1.1e-05	0.00274598	0.00247255
2	APOB	6	GTF2H5	1.19e-05	6.51744e-05	0.0135559
2	APOB	14	FBXO33	2.13e-05	0.0376589	2.70645e-05
2	APOB	17	FOXJ1	2.81e-05	0.00929913	7.07301e-06
2	APOB	4	PDS5A	3.2e-05	0.0263412	3.98456e-09
2	APOB	6	NEU1	4.79e-05	0.000412522	0.0327961
2	APOB	8	ARC	5.48e-05	0.0523294	0.00044068
2	APOB	13	GTF3A	6.85e-05	0.00138128	0.00017232
2	APOB	3	BTD	8.01e-05	0.361331	0.00012422
2	APOB	18	SERPINB2	8.09e-05	0.0116438	0.000134442
2	APOB	6	RNF146	9.12e-05	0.00560815	0.000427671
2	GCKR	6	PRDM13	9.05e-07	0.0040984	2.62318e-06
2	GCKR	14	JKAMP	3.93e-06	0.270914	2.48621e-06
2	GCKR	23	KDM6A	7.05e-06	0.0476484	6.19805e-07
2	GCKR	11	JRKL	2.91e-05	0.00233271	2.40751e-05
2	GCKR	3	MAGEF1	3.69e-05	0.728755	5.04522e-06
2	GCKR	14	VCPKMT	3.74e-05	0.515642	0.000171411
2	GCKR	20	GSS	5.02e-05	0.809098	1.13363e-08
2	GCKR	13	GTF3A	5.76e-05	0.000335363	0.000157497
2	GCKR	22	CARD10	5.79e-05	0.189043	0.0148007
2	GCKR	12	AQP5	6.36e-05	0.0926603	0.00589368
2	GCKR	2	C2orf76	7.06e-05	0.184247	0.000490415
2	GCKR	22	NHP2L1	7.35e-05	0.591518	0.00697593
2	GCKR	17	SLC25A11	8.62e-05	0.996949	1.96499e-06
2	GCKR	18	TNFRSF11A	9.06e-05	0.80073	0.000808865
2	GCKR	3	EIF5A2	9.58e-05	0.482985	0.00330002
2	MMADHC	2	GALNT3	5.66e-06	0.00164	0.00676445
2	NABP1	7	MLXIPL	4.27e-05	0.000349618	0.0167487
2	FER1L5	11	APOA5	1.73e-05	0.217332	0.000130155
2	NABP1	11	APOA4	8.85e-05	0.00531327	0.022169
2	BUB1	11	APOA1	6.2e-05	0.128551	6.57579e-06
2	IQCA1	11	FADS2	6.68e-05	0.000695093	0.000123809
2	C2orf82	11	FADS2	9.74e-05	0.000269446	0.000100939
2	DYNC2LI1	11	FADS3	5.64e-05	0.0650886	2.23723e-05
2	SGOL2	12	MVK	5.91e-05	0.289702	0.000576127
2	ATOH8	16	CETP	2.97e-05	0.735619	0.0243954
2	NCK2	16	CETP	4.46e-05	0.428032	0.000841483
3	CADPS	7	MLXIPL	2.98e-06	0.34344	7.68551e-05
3	KY	7	BAZ1B	1.22e-05	0.336569	1.74008e-06
3	KLHL18	7	TBL2	3.23e-05	0.00442223	2.58909e-05
3	HES1	7	TBL2	9.73e-05	0.000292142	9.23241e-05
3	UBA5	8	LPL	1.4e-06	6.53999e-05	0.0339606
3	UBA5	9	ABCA1	2.05e-05	0.00153623	0.0117733
3	KLHL18	9	ABCA1	2.54e-05	0.0484955	0.000745
3	SHISA5	9	ABCA1	6.89e-05	0.856454	0.00473527
3	UBA5	11	APOA5	3.96e-06	8.45996e-06	0.0450081
3	MME	11	FADS3	1.14e-06	0.240977	0.000710216
3	KLHL18	11	FADS3	6.58e-05	0.149414	0.00272511
3	UBA5	11	FADS3	7.65e-05	5.89783e-05	0.0380232
3	KLHL18	15	LIPC	6.38e-06	0.029382	0.000199246
3	ALCAM	16	CETP	4.27e-06	0.461248	0.00165639
3	TRIM42	16	CETP	1.95e-05	0.2082	1.68413e-06
3	MAGI1	16	CETP	4.21e-05	0.875012	2.57783e-05
3	KLF15	16	CETP	5.2e-05	0.684626	0.0225177
3	HRASLS	16	CETP	8.79e-05	0.904248	0.0272101
3	OXSR1	16	PRMT7	5.91e-05	0.171076	8.17367e-05
3	UBA5	16	PRMT7	7.32e-05	0.0265721	0.0142129
3	KLHL18	7	DNAH11	3.06e-05	0.0366052	2.51253e-05
4	CXCL2	5	HMGCR	8.45e-05	0.444949	0.0159804
4	CXCL2	7	MLXIPL	2.79e-05	0.00922846	0.00629868
4	CXCL2	7	BAZ1B	6.98e-05	0.0354601	0.00818651
4	CXCL2	11	APOA5	1.45e-05	0.0216036	0.0209551
4	GC	11	APOA1	1.64e-06	0.914581	1.1212e-05
4	CXCL2	11	MADD	4.27e-05	0.00743865	0.0054073
4	PHOX2B	11	FOLH1	7.71e-06	1.08662e-06	3.13873e-08
4	CXCL2	11	FOLH1	2.17e-05	0.0214476	0.00893761
4	CXCL2	12	MMAB	1.78e-06	0.351413	0.0101205
4	SMR3A	16	CETP	6.09e-07	0.591586	0.00215049
4	ARL9	16	CETP	2.42e-05	0.248801	0.034346
4	AASDH	16	PRMT7	9.97e-05	0.91443	0.00359666
4	LETM1	18	GALNT1	2.43e-07	0.76654	5.73959e-05
4	CXCL2	19	APOE	1.91e-06	0.0546216	0.0193064
4	ENOPH1	19	APOE	8.79e-05	0.0840263	0.0510357
5	HMGCR	6	LPAL2	1.78e-05	2.10412e-06	1.00862e-06
5	HMGCR	23	CASK	3.43e-05	0.967546	0.0479946
5	FGF10	5	HMGCR	9.69e-05	0.00226689	0.00060444
5	TIGD6	11	APOA1	5.52e-05	0.00342043	0.0195378
5	TIGD6	15	LIPC	7.75e-05	0.0140553	0.00547343
5	COL23A1	16	CETP	3.24e-06	0.574541	0.000209473
5	GTF2H2	16	CETP	2.88e-05	0.213477	0.00369652
5	GTF2H2C	16	CETP	2.88e-05	0.213477	0.00369652
5	LOX	19	LDLR	1.05e-05	0.000715945	5.06513e-05
5	COL23A1	19	APOE	2.29e-06	0.85105	4.56456e-05
5	ZNF354B	7	DNAH11	2.1e-05	0.00259235	0.000635306
5	COL23A1	7	DNAH11	4.32e-05	0.962315	2.89357e-05
6	CCDC167	7	BAZ1B	2.36e-05	1.02743e-05	0.00941437
6	NEU1	8	LPL	2.04e-05	0.000664346	0.0700282
6	NEU1	11	APOA4	1.49e-05	0.00144639	0.0490614
6	PRDM13	11	APOA1	1.32e-05	0.0044141	0.000206373
6	DYNLT1	11	APOA1	2.65e-05	0.00183527	4.93353e-05
6	NEU1	11	MADD	1.47e-05	0.000714655	0.0472172
6	NEU1	11	FOLH1	3.84e-05	0.000805897	0.0537642
6	TREML4	12	MVK	6.71e-05	0.624742	0.00616864
6	NEU1	12	MMAB	1.57e-05	8.18648e-05	0.0254384
6	NEU1	15	LIPC	2.49e-05	0.000667601	0.0401908
6	THEMIS	15	LIPC	7.19e-05	0.029643	0.000141104
6	LAMA2	15	LIPC	9.22e-05	0.244088	0.000141104
6	HLA-A	16	CETP	1.71e-06	0.165131	0.000705076
6	ATAT1	16	CETP	4.28e-06	0.462654	0.00118956
6	DDR1	16	CETP	5.62e-06	0.632654	0.00118956
6	LY86	16	CETP	2.01e-05	0.504472	0.0750533
6	NEU1	16	CETP	2.28e-05	0.000143592	0.0646585
6	MYLK4	16	CETP	3.59e-05	0.761988	0.00230872
6	CAPN11	16	CTCF	6.08e-05	0.0126581	0.00162724
6	NEU1	16	PRMT7	4.45e-05	0.000443506	0.0327961
6	MRPS18A	18	GALNT1	8.31e-07	1.53883e-05	6.05741e-06
6	GTF2H5	18	LIPG	3.91e-06	7.51427e-06	0.0124233
6	NEU1	18	LIPG	3.84e-05	0.000195883	0.0841204
6	NEU1	19	LDLR	2.27e-05	0.00163398	0.0490614
7	MLXIPL	8	PPP2CB	1.92e-05	0.25789	0.00102206
7	MLXIPL	15	UBR1	1.96e-05	0.00427984	9.14175e-05
7	MLXIPL	11	ZP1	5.51e-05	0.00225909	0.000922256
7	MLXIPL	8	CLN8	7.46e-05	0.0044189	0.000163065
7	BAZ1B	19	MAST1	2.56e-05	0.0110663	0.00507284
7	BAZ1B	23	ZCCHC5	3.11e-05	0.117614	0.0123598
7	BAZ1B	23	POU3F4	4.09e-05	0.851379	0.0587135
7	BAZ1B	15	UBR1	8.18e-05	0.0295162	0.00127804
7	TBL2	19	A1BG-AS1	2.39e-05	6.8523e-06	0.00237426
7	AOAH	7	MLXIPL	5.25e-05	0.54843	0.000126765
7	EPO	11	FADS3	1.96e-05	0.000540886	0.000122419
7	TAS2R40	12	MVK	4.07e-05	9.4151e-06	3.19628e-06
7	EPO	16	CETP	3.4e-06	0.0527193	1.38561e-06
7	COA1	16	CETP	7.89e-05	0.251518	0.000404634
7	DNAH11	12	PLA2G1B	5.01e-06	0.00848113	8.96483e-05
7	DNAH11	8	CLN8	2.81e-05	0.00545865	0.000168323
7	DNAH11	19	KCNA7	5.74e-05	0.661909	0.00128675
7	DNAH11	13	GTF3A	6.38e-05	0.00151604	0.000116465
8	PDGFRL	16	CETP	1.98e-05	0.275947	0.00236784
8	LPL	9	LCN12	6.82e-05	0.856213	0.000670111
8	SYBU	11	APOA4	4.43e-06	0.138948	9.37826e-07
8	KAT6A	11	APOA4	5.65e-05	0.442855	0.000506099
8	SNTB1	11	FADS3	6.29e-05	0.0824592	0.0250316
8	SH2D4A	11	MADD	7.6e-05	0.62895	1.09402e-08
8	FGL1	12	MVK	1.02e-05	4.97583e-05	1.33032e-06
8	PDGFRL	12	MVK	1.32e-05	5.75828e-05	1.1303e-06
8	SNTB1	12	MVK	2.56e-05	6.48365e-05	0.000239943
8	RB1CC1	12	MVK	2.94e-05	2.91392e-05	1.41152e-05
8	EEF1D	12	MVK	2.96e-05	0.143437	0.00548936
8	SNTB1	15	LIPC	7.85e-06	0.000398262	0.000222112
8	CLVS1	16	CETP	6.66e-07	0.129351	0.0278671
8	ODF1	16	CETP	4.34e-06	0.0206966	0.00167731
8	PURG	16	CETP	3.85e-05	0.750538	0.0647103
8	CLVS1	16	PRMT7	5.28e-05	0.796632	0.00130441
8	ZHX1	16	PRMT7	8.44e-05	0.111765	0.00449676
8	SNTB1	19	LDLR	4.76e-07	2.54138e-05	3.92949e-06
9	ABCA1	12	CLEC4C	8.52e-06	2.13011e-05	0.0112357
9	ABCA1	10	NPFFR1	1.57e-05	0.560622	0.0017748
9	ABCA1	13	GTF3A	4.65e-05	0.00131409	0.000130181
9	ABCA1	23	GRPR	4.81e-05	0.0184263	0.0065053
9	ABCA1	14	PPM1A	9.16e-05	0.00195323	0.0049144
9	TOR1B	12	MVK	9.54e-05	0.551866	0.000175982
9	ROR2	16	CETP	5.25e-06	0.403376	1.07221e-05
9	PLGRKT	16	CETP	4.21e-05	0.625337	0.0224384
9	KLF9	16	CETP	4.37e-05	0.210575	0.0427169
9	LCN1	18	LIPG	1.89e-05	1.60515e-06	6.86817e-06
9	GAS1	19	APOE	1.78e-05	2.48877e-06	1.24639e-06
10	PNLIPRP1	11	FADS3	5.71e-05	0.476493	0.00204661
10	CHUK	11	MADD	9.36e-05	0.0236411	0.00156214
10	RPS24	16	CETP	4.67e-05	6.91656e-05	3.68268e-07
11	APOA5	23	MAOB	2.03e-05	0.00576452	1.39641e-07
11	APOA5	12	NOP2	9.17e-05	0.471463	0.0207055
11	APOA4	12	CLEC4C	6.59e-05	1.65097e-05	0.0273261
11	APOA1	14	YY1	1.45e-05	0.000405915	1.59415e-06
11	APOA1	23	GAGE10	1.82e-05	0.372926	0.0292857
11	APOA1	18	MC4R	4.36e-05	0.6018	0.0278666
11	FADS2	16	PRM3	1.16e-05	0.0862348	0.000370876
11	FADS2	23	VCX	3.64e-05	0.0588682	8.29097e-05
11	FADS2	23	ZNF41	7.3e-05	0.236358	0.00569886
11	FADS2	13	GTF3A	7.75e-05	0.00154893	0.000155373
11	FADS2	14	CHURC1	9.77e-05	0.0211224	0.000557931
11	FADS3	11	JRKL	3.07e-05	0.00133697	2.57712e-05
11	MADD	16	SPSB3	4.3e-05	0.889322	4.46281e-05
11	MADD	13	GTF3A	7.47e-05	0.00158122	0.000177023
11	FOLH1	23	POF1B	5.82e-06	0.135276	0.000145888
11	FOLH1	13	GTF3A	4.78e-05	0.00122083	0.000119573
11	FOLH1	15	C15orf40	6.27e-05	0.00663167	0.00738933
11	FOLH1	12	HOXC5	9.49e-05	0.000220331	6.92389e-05
11	MRGPRX4	11	APOA5	4.32e-05	0.0192666	0.00844416
11	JRKL	11	APOA4	5.52e-05	0.0375814	0.0180067
11	JRKL	11	APOA1	8.04e-05	0.00247318	2.06222e-05
11	JRKL	12	MVK	4.7e-05	0.0018967	3.85347e-05
11	JRKL	12	MMAB	4.8e-05	0.00167325	0.0224384
11	ALX4	16	CETP	1.93e-06	0.560923	0.000489831
11	RAB39A	16	CETP	5.03e-05	0.113377	9.46324e-06
11	TRIM6-TRIM34	16	CETP	6.94e-05	0.539488	0.00123614
11	JRKL	16	PRMT7	4.02e-05	0.000724746	0.0111828
11	OMP	18	GALNT1	3.89e-05	0.212552	0.00369037
11	SDHD	18	LIPG	6.18e-07	0.885771	3.75217e-06
11	NAALADL1	18	LIPG	1.53e-06	0.00810754	0.00106186
11	DIXDC1	18	LIPG	8.45e-05	0.969156	7.57291e-06
11	JRKL	19	LDLR	7.37e-06	0.0458173	2.6364e-05
12	MVK	14	ACYP1	1.04e-06	0.066798	0.00168496
12	MVK	19	CAPN12	5.78e-06	0.00472976	0.00132482
12	MVK	5	CSNK1G3	7e-06	0.808832	5.1128e-07
12	MVK	23	MST4	9.38e-06	0.748452	0.0162718
12	MVK	19	ZNF225	1.41e-05	0.409785	0.00127939
12	MVK	17	GJD3	3.65e-05	4.05908e-05	1.45427e-05
12	MVK	19	A1BG-AS1	4.85e-05	0.000364528	9.35778e-06
12	MMAB	14	FUT8	8.75e-05	0.811015	0.00645338
12	CLEC4C	12	MVK	5.53e-05	0.00232441	0.0131148
12	CLEC4C	12	MMAB	2.35e-06	0.00396338	0.0186735
12	GRIN2B	15	LIPC	5.92e-05	0.0164679	0.000156222
12	SMAGP	16	CETP	1.77e-05	0.084445	0.0672884
12	CHST11	16	CETP	2.74e-05	0.0903284	0.0058062
12	UBE2N	16	CETP	6.61e-05	0.200504	0.00287351
12	CLEC4C	16	CETP	8.05e-05	1.82525e-05	0.0371832
12	GPR84	16	CTCF	9.23e-05	0.0257818	0.000710834
12	CLEC4C	16	PRMT7	1.01e-06	0.000194392	0.016602
12	CLEC4C	18	GALNT1	2.98e-06	1.90887e-05	0.0453521
12	LRRC10	18	LIPG	1.98e-05	0.325248	0.00299637
12	CLEC4C	18	LIPG	8.43e-05	0.00015199	0.0499461
12	CLEC4C	19	LDLR	5.5e-05	0.000130899	0.0273261
12	CLEC4C	19	APOE	6.22e-06	0.00204143	0.0642408
14	C14orf37	16	CETP	7.23e-06	0.0330947	6.49358e-06
14	GPHB5	16	CETP	9.18e-06	0.0105721	0.00491334
14	YY1	16	CETP	7.76e-05	0.116894	7.73539e-06
14	TDP1	16	PRMT7	1.83e-05	0.185365	0.000298744
14	POTEG	18	GALNT1	1.05e-05	0.716238	0.020802
14	PPM1A	19	APOE	5.31e-05	0.574006	0.0276696
15	FEM1B	16	CETP	2.13e-05	0.399714	0.0275424
15	RYR3	16	CETP	4.35e-05	0.517498	6.63941e-06
15	HERC2P3	16	CETP	6.58e-05	0.955703	0.00133011
15	ABHD17C	16	CETP	7.47e-05	0.344375	0.0497865
15	COX5A	18	GALNT1	7.34e-05	0.0151407	0.0463368
16	CETP	20	PIGT	7.86e-06	0.00338277	0.000449223
16	CETP	17	ZNF207	1.64e-05	0.782761	1.04344e-05
16	CETP	17	ZPBP2	3.41e-05	0.00925896	0.00107665
16	CETP	22	CHKB	3.47e-05	0.0755655	0.00395303
16	CETP	23	SCML1	4.88e-05	0.0375395	0.0705497
16	CETP	17	OR3A1	6.03e-05	0.0247786	0.00167716
16	CETP	17	RPL26	8.29e-05	0.241021	0.00416457
16	CETP	17	RSAD1	9.15e-05	0.670309	0.00412534
16	CETP	17	LUC7L3	9.2e-05	0.86021	0.00100558
16	CETP	20	CD40	9.5e-05	0.09613	0.000208474
16	CTCF	23	POU3F4	6.9e-05	0.957689	0.0629101
16	PRMT7	23	SCML1	1.59e-05	0.0349939	0.0282837
16	PRMT7	23	GRPR	3.17e-05	0.0159601	0.00801263
16	PRMT7	16	PDF	4.12e-05	0.0991628	8.74079e-05
16	LYRM1	16	CETP	2.08e-05	0.977834	0.00997713
16	CPPED1	16	CETP	3.85e-05	0.266109	0.0113582
16	ORC6	18	GALNT1	2.37e-06	0.728588	0.0335618
16	FBRS	19	APOE	1.82e-06	4.05989e-06	5.23227e-07
18	GALNT1	23	POU3F4	4.36e-05	0.611106	0.0915208
18	LIPG	23	POF1B	8.22e-06	0.0896527	0.00013508
19	LDLR	22	CARD10	6.67e-05	0.500722	0.00622787
19	APOE	23	SCML1	3.58e-06	0.00845064	0.00092372
